# Supplementary material
Source: PubMed Central journal article supplement (PMC2084313)
Supplement: pnas_0708659104_5.pdf [file pnas_0708659104_5.pdf]

**Table 3. Detailed analysis of published conditions for *DUX4* mRNA detection**

| Material or step in the procedure | Present study                                                                                                                                                                       | Hewitt <i>et al.</i> (1), Lyle <i>et al.</i> (2) | Yip and Picketts (3)                    | Winokur <i>et al.</i> (4) | Osborne <i>et al.</i> (5)                        | Alexiadis <i>et al.</i> (6)                                                   |
|-----------------------------------|-------------------------------------------------------------------------------------------------------------------------------------------------------------------------------------|--------------------------------------------------|-----------------------------------------|---------------------------|--------------------------------------------------|-------------------------------------------------------------------------------|
| Transfected cells                 | C2C12 (D4Z4 + <i>pLAM</i> )                                                                                                                                                         | NA                                               | C2C12 (D4Z4 concatemer no <i>pLAM</i> ) | NA                        | NA                                               | NA                                                                            |
| Myoblasts                         | Differentiating (more abundant RNA than in proliferating cells) From control and FSHD                                                                                               | NA                                               | Proliferating and differentiating C2C12 | NA (biopsies)             | NA (biopsies)                                    | Proliferating (?) From control and FSHD                                       |
| Expression study                  | RT-PCR                                                                                                                                                                              | Screening of cDNA libraries                      | RT-PCR                                  | Microarray                | Microarray                                       | RT-PCR                                                                        |
| RNA extraction                    | NucleoSpin RNAII (Macherey-Nagel) or Aurum Total RNA Mini kit (BioRad)*                                                                                                             | -                                                | Guanidinium salt                        | TRIzol                    | TRI-Reagent [refers to Welle <i>et al.</i> (18)] | TRIzol                                                                        |
| DNase treatment                   | From the kit: directly on RNA bound to the silica membrane (* + 1 unit/ $\mu$ g of DNase I Amplification grade (Invitrogen) + 10 units of RNase inhibitor (Fermentas) 10 mM DTT, 15 | -                                                | -                                       | -                         | -                                                | RQ1 (Promega) 1 unit/10 $\mu$ g RNA 60 min 37°C or DNaseI Amplification grade |

| Material or step in the procedure | Present study                                                                                                    | Hewitt <i>et al.</i> (1), Lyle <i>et al.</i> (2) | Yip and Picketts (3)        | Winokur <i>et al.</i> (4)       | Osborne <i>et al.</i> (5)                          | Alexiadis <i>et al.</i> (6)                   |
|-----------------------------------|------------------------------------------------------------------------------------------------------------------|--------------------------------------------------|-----------------------------|---------------------------------|----------------------------------------------------|-----------------------------------------------|
|                                   | <b>min RT</b>                                                                                                    |                                                  |                             |                                 |                                                    | (Invitrogen)<br>3 units/3 µg<br>RNA 45 min RT |
| RT                                | <b>DUX4-specific primer</b>                                                                                      | -                                                | Random hexamers             | Oligo dT-[T7]                   | oligo-dT-[T7] [refers to Welle <i>et al.</i> (19)] | Random hexamers                               |
| denaturing step                   | 2-4 µg of fresh RNA (immediately after extraction and DNase-treatment) + primer + dNTPs 5 min 65°C, 1 min on ice | -                                                | 5 µg                        |                                 |                                                    | 10 and 3 µg?                                  |
| enzyme                            | 200 units of SuperScript III (Invitrogen) per tube, on ice final reaction volume: 20µl                           | -                                                | Superscript RT (Invitrogen) | Superscript choice (Invitrogen) | ?                                                  | SuperScript III (Invitrogen)                  |
| T°/timing                         | 55°C, 1 h<br>Inactivation: 70°C 15 min<br><b>20 min 37°C (2.5 units)</b>                                         | -                                                | 42°C 50 min (?)             | ?                               | ?                                                  | 50°C 50 min (?)                               |
| RNase H treatment                 |                                                                                                                  | -                                                | ?                           |                                 |                                                    | ?                                             |
| PCR primers                       | Forward: <i>DUX4</i> sequence in D4Z4; Reverse: <i>DUX4</i> sequence in pLAM                                     |                                                  |                             | <i>DUX4</i> sequence in D4Z4    |                                                    | <i>DUX4</i> sequence in D4Z4                  |

| Material or step in the procedure | Present study                                                                                                                      | Hewitt <i>et al.</i> (1), Lyle <i>et al.</i> (2) | Yip and Picketts (3)  | Winokur <i>et al.</i> (4) | Osborne <i>et al.</i> (5) | Alexiadis <i>et al.</i> (6) |
|-----------------------------------|------------------------------------------------------------------------------------------------------------------------------------|--------------------------------------------------|-----------------------|---------------------------|---------------------------|-----------------------------|
| PCR                               | 8-12 $\mu$ l of cDNA Touch-down Platinum <i>Pfx</i> DNA polymerase with the <b>PCRx enhancer solution (final concentration 3X)</b> | -                                                | 2 $\mu$ l of cDNA (?) |                           |                           | 2 $\mu$ l of cDNA (?)       |

The question marks in brackets refer to missing indications in the studies or basic procedures of the RT instruction manuals. NA, not applicable.
